# Supplementary material for: The De-Icing Comparison Experiment (D-ICE): a study of broadband radiometric measurements under icing conditions in the Arctic
Source: Copernicus journal article supplement (doi:10.5194/amt-14-1205-2021), 2021-02-16
Supplement: Supplementary file 1 [file amt-14-1205-2021-supplement.zip]

Archive with 4 entries (4 files):
- S2.pdf
- S3.pdf
- S1.pdf
- amt-14-1205-2021-supplement-title-page.pdf
