# Supplementary material for: The De-Icing Comparison Experiment (D-ICE): a study of broadband radiometric measurements under icing conditions in the Arctic
Source: Copernicus journal article supplement (doi:10.5194/amt-14-1205-2021), 2021-02-16
Supplement: Supplementary file 1 [file amt-14-1205-2021-supplement.zip › amt-14-1205-2021-supplement-title-page.pdf]

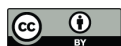

## *Supplement of*

# **The De-Icing Comparison Experiment (D-ICE): a study of broadband radiometric measurements under icing conditions in the Arctic**

**Christopher J. Cox et al.**

*Correspondence to:* Christopher J. Cox ([christopher.j.cox@noaa.gov](mailto:christopher.j.cox@noaa.gov))

- [amt-14-1205-2021-supplement-title-page.pdf](#)
- [S1.pdf](#)
- [S2.pdf](#)
- [S3.pdf](#)

The copyright of individual parts of the supplement might differ from the CC BY 4.0 License.
